# Supplementary material
Source: PubMed Central journal article supplement (PMC3207163)
Supplement: mmc1.pdf [file mmc1.pdf]

Supporting Material for:

## **Segmental polymorphism in a functional amyloid**

Kan-Nian Hu<sup>\*</sup>, Ryan P. McGlinchey<sup>†</sup>, Reed B Wickner<sup>†</sup>, and Robert Tycko<sup>\*‡</sup>

<sup>\*</sup>Laboratory of Chemical Physics

National Institute of Diabetes and Digestive and Kidney Diseases

National Institutes of Health

Bethesda, MD 20892-0520

<sup>†</sup>Laboratory of Biochemistry and Genetics

National Institute of Diabetes Digestive and Kidney Diseases

National Institutes of Health

Bethesda, MD 20892-8013

Contains Figs. S1-S4 and Tables S1-S6

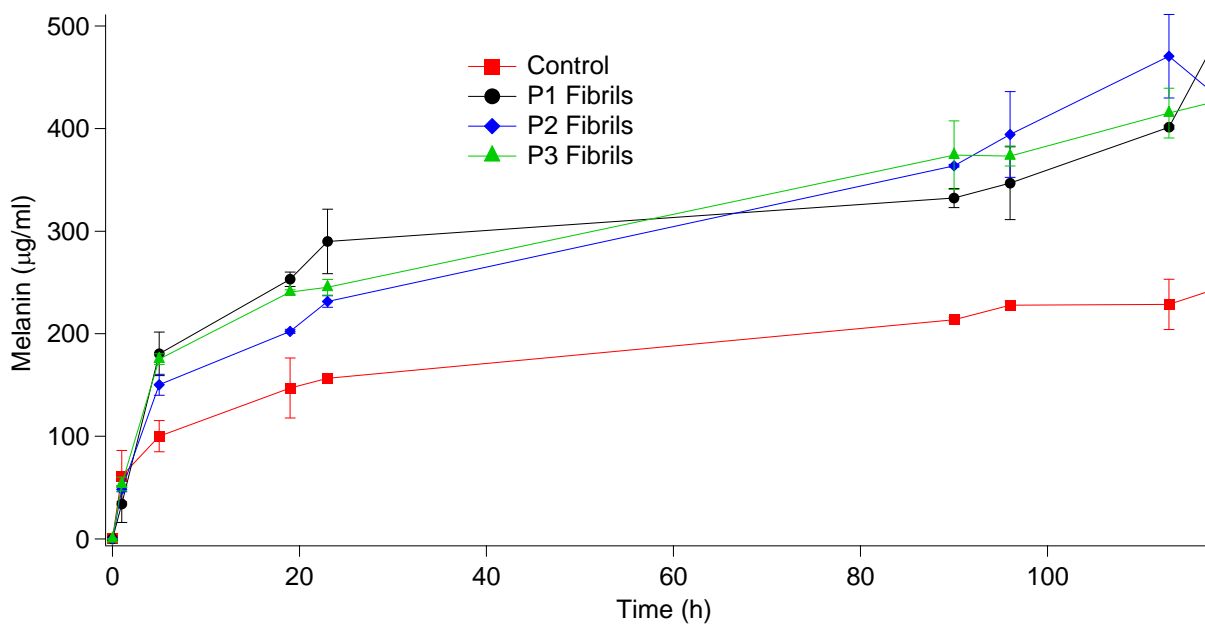

Figure S1: Acceleration of melanin synthesis by Pmel17:RPT fibrils. A time course of melanin synthesis *in vitro* shows that P1, P2 and P3 fibrils enhance the rate of melanin formation when compared with no fibrils (control). Assays followed the protocol described by McGlinchey *et al.* (Proc. Natl. Acad. Sci. U. S. A., vol.106, pp. 13731-13736, year 2009). Briefly, P1, P2 or P3 fibrils (9.0  $\mu\text{M}$ ) were added to 5 mM DL-DOPA in 0.20 mL of 20 mM K acetate buffer, 100 mM NaCl, pH 5.0. Tyrosinase (2  $\mu\text{g}$ ) was added to initiate the reactions, followed by incubation at 37 $^{\circ}$  C with agitation (600 rpm). Reactions were stopped by centrifugation, and pellets containing the melanin product were resuspended in 1 M NaOH and heated at 60 $^{\circ}$  C for 5 min. Absorbance at 400 nm was used to measure melanin concentration. Synthetic melanin was used to calibrate the absorbance. P1, P2, and P3 fibrils in these assays were aliquots of the samples used for solid state NMR measurements.

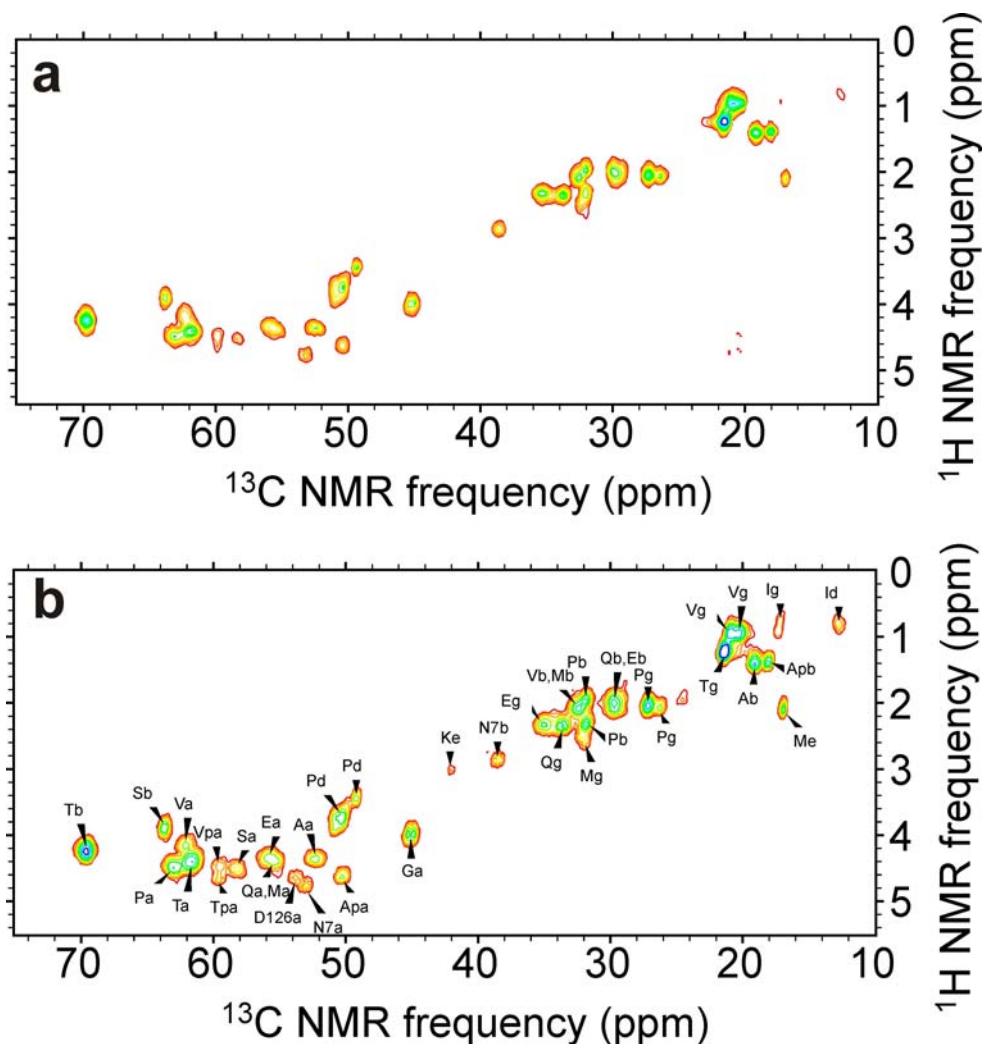

Figure S2: 2D  $^1\text{H}$ - $^{13}\text{C}$  INEPT spectra of Pmel17:RPT fibrils. Spectra for P1 (a) and P2 (b) fibrils are shown, in which signals arise from a subset of residues outside the fibril core that are highly mobile. Residue-type assignments are based on random coil chemical shifts for various residues types, and are therefore the same in both spectra. Unique assignments for N7 and D126 are possible because the Pmel17:RPT sequence contains single Asn and Asp residues. Residues that precede a Pro are indicated by "p"; "a", "b", "g", "d", and "e" indicate signals from  $\alpha$ -,  $\beta$ -,  $\gamma$ -,  $\delta$ -, and  $\epsilon$ -carbons.

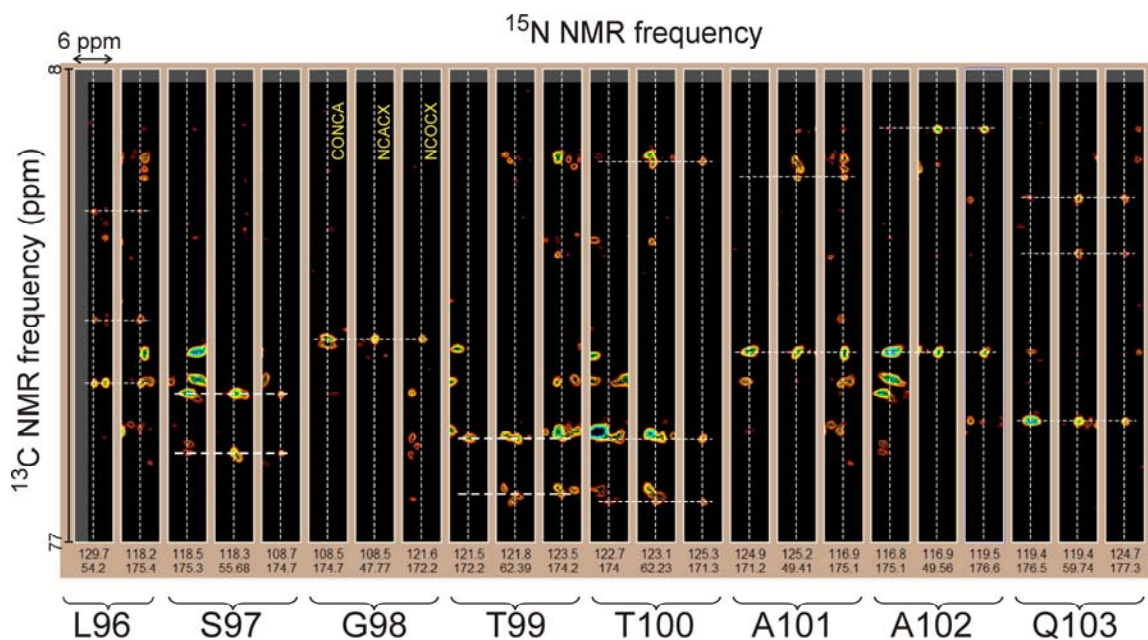

Figure S3: Representative regions of 2D  $^{15}\text{N}$ - $^{13}\text{C}$  planes from 3D CONCA, NCACX, and NCOCX spectra of P2 fibrils. These regions display the sequential connections among chemical shifts for residues 96-103. For each residue  $k$ , regions that contain signals at the  $^{13}\text{C}_\alpha$  chemical shift of residue  $k$  are shown. The CONCA region contains signals at the  $^{13}\text{CO}$  chemical shift of residue  $k-1$  ( $t_1$  dimension, not shown), the  $^{15}\text{N}$  chemical shift of residue  $k$  ( $t_2$  dimension), and the  $^{13}\text{C}_\alpha$  chemical shift of residue  $k$  ( $t_3$  dimension); the NCACX region contains signals at the backbone  $^{15}\text{N}$  chemical shift of residue  $k$  ( $t_1$  dimension), the  $^{13}\text{C}_\alpha$  chemical shift of residue  $k$  ( $t_2$  dimension, not shown), and the backbone  $^{13}\text{CO}$ ,  $^{13}\text{C}_\alpha$ , and sidechain  $^{13}\text{C}$  chemical shifts of residue  $k$  ( $t_3$  dimension); the NCOCX region contains signals at the backbone  $^{15}\text{N}$  chemical shift of residue  $k+1$  ( $t_1$  dimension), the backbone  $^{13}\text{CO}$  chemical shift of residue  $k$  ( $t_2$  dimension, not shown), and the backbone  $^{13}\text{CO}$ ,  $^{13}\text{C}_\alpha$ , and sidechain  $^{13}\text{C}$  chemical shifts of residue  $k$  ( $t_3$  dimension). Assignments for residues 86-111 were determined unambiguously by the Monte Carlo/simulated annealing algorithm in the program MCASSIGN2.

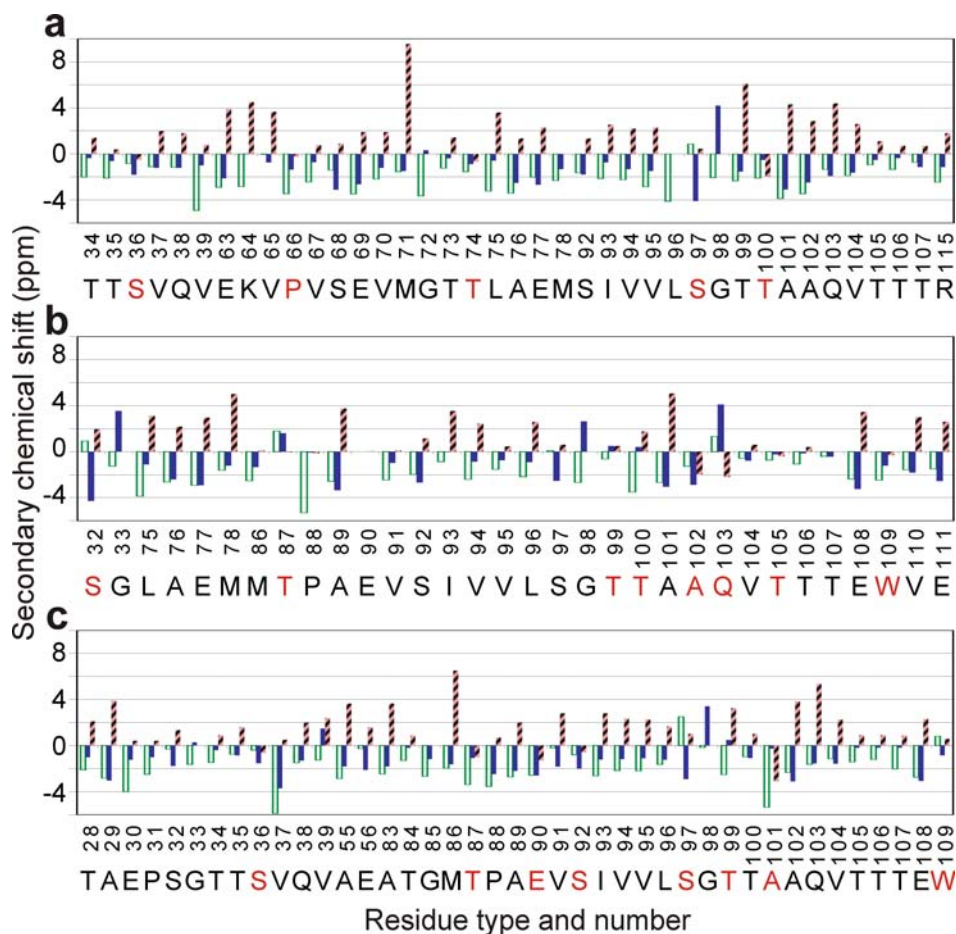

Figure S4: Secondary chemical shifts in Pmel17:RPT fibrils. Secondary shifts (*i.e.*, differences between experimentally determined  $^{13}\text{C}$  shifts and random coil values) are shown for the unambiguously assigned residues of P1 (a), P2 (b) and P3 (c) fibrils. Results are shown for backbone  $^{13}\text{C}\text{O}$  (open bars),  $^{13}\text{C}\alpha$  (solid bars), and  $^{13}\text{C}\beta$  (striped bars) sites. Red lettering indicates residues with secondary shifts that indicate non- $\beta$ -strand conformations. Note that secondary chemical shifts for Gly residues do not correlate with secondary structure, so conclusions can not be drawn for Gly residues.

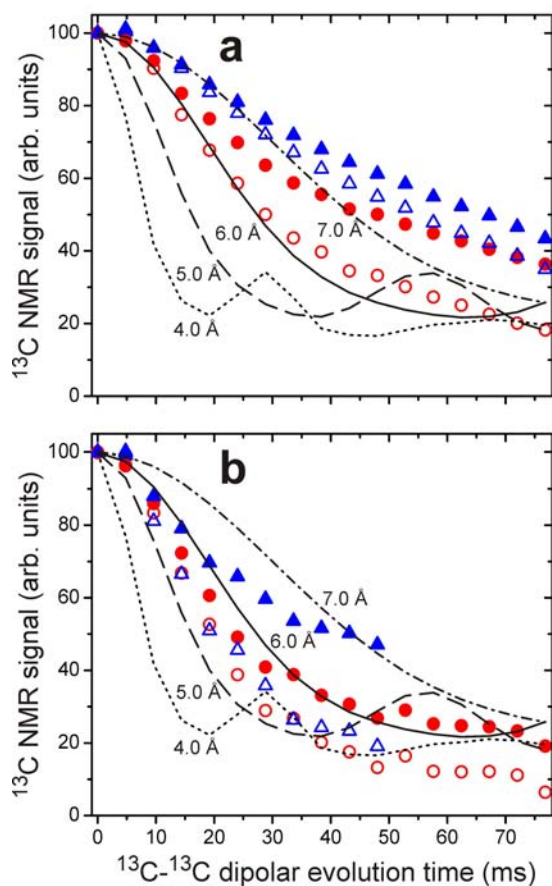

Figure S5: Measurements of  $^{13}\text{C}$ - $^{13}\text{C}$  dipole-dipole couplings in Pmel17:RPT fibrils. The fibrils were  $^{13}\text{C}$ -labeled only at backbone carbonyl sites of all Met (triangles) or all Leu (circles) residues. Measurements were performed on lyophilized fibrils (a) and on fibrils that were rehydrated by addition of  $\text{H}_2\text{O}$  to the lyophilized samples within the MAS rotors (b). Solid symbols are the raw experimental data, with signal amplitudes at zero dipolar evolution time normalized to 100. Curves are ideal numerical simulations for linear chains of dipole-coupled  $^{13}\text{C}$  nuclei with the indicated spacings. Hollow symbols are the experimental data after subtraction of signal contributions from natural-abundance  $^{13}\text{C}$  nuclei at carbonyl and carboxyl sites. Natural-abundance contributions are assumed to decay linearly to 70% of their initial values over the full 76.8 ms evolution time, as indicated by measurements on unlabeled samples. In the lyophilized samples, natural-abundance

signals for Met-labeled and Leu-labeled samples are taken to be 24% and 35% of the total  $^{13}\text{C}$  NMR signals, respectively, calculated from the 1.1% natural-abundance level and the numbers of labeled and unlabeled carbonyl and carboxyl sites in Pmel17:RPT. In the rehydrated samples, natural-abundance signals for Met-labeled and Leu-labeled samples are taken to be 45% and 20%, respectively, adjusted to cancel experimental signal components that apparently decay slowly in the PITHIRDS-CT data. In the lyophilized state, it is reasonable to assume that all carbonyl and carboxyl sites contribute to the data, regardless of whether these sites are in the cross- $\beta$  structure of the fibrils. In the rehydrated state, it is reasonable to assume that only sites in the cross- $\beta$  structure contribute to the data. The observation that the major fraction of the signal from rehydrated fibrils decays on the 30 ms time scale characteristic of 5 Å  $^{13}\text{C}$ - $^{13}\text{C}$  distances is consistent with a parallel  $\beta$ -sheet structure in Pmel17:RPT fibrils.

Table S1: Signals from 3D solid state NMR spectra of P1 fibrils, used as input for MCASSIGN2. Each row is one multidimensional signal. Columns are chemical shifts (in ppm) of backbone amide nitrogens,  $\alpha$ -carbons, carbonyl carbons,  $\beta$ -carbons, and  $\gamma$ -carbons, uncertainties in the chemical shifts, signal degeneracies, and possible residue-type assignments. Absent values are indicated by #.

NCACX spectrum

| $\nu(N)$ | $\nu(Ca)$ | $\nu(C)$ | $\nu(Cb)$ | $\nu(Cg)$ | $\delta(N)$ | $\delta(Ca)$ | $\delta(C)$ | $\delta(Cb)$ | $\delta(Cg)$ | deg. | type   |
|----------|-----------|----------|-----------|-----------|-------------|--------------|-------------|--------------|--------------|------|--------|
| 113.4    | 56.4      | 173.7    | #         | #         | 0.4         | 0.2          | 0.3         | #            | #            | 1    | K      |
| 114.0    | 59.0      | 174.7    | #         | #         | 0.3         | 0.2          | 0.3         | #            | #            | 1    | V      |
| 118.5    | 54.0      | 174.6    | 42.7      | #         | 0.3         | 0.2          | 0.3         | 0.3          | #            | 1    | M      |
| 104.0    | 45.4      | 171.3    | #         | #         | 0.4         | 0.2          | 0.3         | #            | #            | 1    | G      |
| 113.8    | 61.5      | 173.4    | 71.3      | 21.0      | 0.3         | 0.2          | 0.3         | 0.3          | 0.3          | 1    | T      |
| 117.3    | 61.1      | 173.1    | 69.2      | #         | 0.3         | 0.2          | 0.3         | 0.2          | #            | 1    | T      |
| 122.2    | 54.5      | 174.4    | 46.0      | #         | 0.3         | 0.2          | 0.3         | 0.2          | #            | 1    | L      |
| 121.3    | 49.9      | 174.3    | 20.4      | #         | 0.3         | 0.2          | 0.3         | 0.2          | #            | 1    | A      |
| 118.0    | 54.1      | 174.6    | 32.2      | #         | 0.3         | 0.2          | 0.3         | 0.2          | #            | 1    | E      |
| 118.1    | 61.4      | 172.8    | 67.8      | #         | 0.3         | 0.2          | 0.3         | 0.3          | #            | 1    | T      |
| 124.7    | 49.5      | 173.9    | 23.3      | #         | 0.3         | 0.2          | 0.3         | 0.2          | #            | 1    | A      |
| 120.3    | 50.1      | 174.3    | 22.0      | #         | 0.3         | 0.2          | 0.3         | 0.2          | #            | 1    | A      |
| 122.1    | 54.9      | 174.0    | #         | #         | 0.3         | 0.2          | 0.3         | #            | #            | 1    | R      |
| 121.5    | 60.3      | 174.2    | 41.5      | #         | 0.3         | 0.2          | 0.3         | 0.3          | #            | 1    | I      |
| 124.3    | 56.5      | 174.0    | 63.3      | #         | 0.4         | 0.3          | 0.4         | 0.2          | #            | 1    | S      |
| 121.5    | 54.2      | 173.6    | 32.6      | #         | 0.3         | 0.2          | 0.3         | 0.4          | #            | 1    | QE     |
| 118.1    | 61.4      | 172.6    | 71.2      | #         | 0.3         | 0.2          | 0.3         | 0.6          | #            | 1    | T      |
| 123.0    | 53.9      | 174.0    | #         | #         | 0.3         | 0.4          | 0.3         | #            | #            | 1    | M      |
| 122.0    | 61.6      | 173.7    | #         | #         | 0.3         | 0.2          | 0.3         | #            | #            | 1    | V      |
| 120.0    | 56.6      | 173.0    | 65.1      | #         | 0.3         | 0.2          | 0.3         | 0.2          | #            | 1    | S      |
| 114.4    | 54.3      | 175.6    | 64.2      | #         | 0.3         | 0.2          | 0.3         | 0.2          | #            | 1    | S      |
| 111.5    | 60.3      | 174.3    | 36.3      | 21.9      | 0.4         | 0.3          | 0.4         | 0.6          | 0.4          | 1    | V      |
| 117.0    | 55.2      | 173.3    | 64.9      | #         | 0.3         | 0.2          | 0.3         | 0.4          | #            | 1    | S      |
| 122.3    | 60.7      | 173.5    | 35.2      | 22.1      | 0.4         | 0.3          | 0.4         | 0.4          | 0.4          | 1    | V      |
| 120.4    | 53.8      | 174.7    | 33.8      | #         | 0.3         | 0.2          | 0.3         | 0.3          | #            | 1    | QEMKR  |
| 121.8    | 61.4      | 173.8    | 70.8      | #         | 0.3         | 0.2          | 0.3         | 0.3          | #            | 1    | T      |
| 121.8    | 61.4      | 173.5    | 70.5      | #         | 0.4         | 0.3          | 0.4         | 0.2          | #            | 1    | T      |
| 118.8    | 54.5      | 174.7    | #         | #         | 0.4         | 0.3          | 0.4         | #            | #            | 1    | QE     |
| 122.0    | 53.8      | 174.5    | 32.1      | #         | 0.3         | 0.2          | 0.3         | 0.3          | #            | 1    | QEKRMW |
| 121.5    | 54.6      | 173.6    | 33.9      | #         | 0.4         | 0.3          | 0.4         | 0.4          | #            | 1    | QEKRMW |
| 118.0    | 49.3      | 172.8    | #         | #         | 0.3         | 0.2          | 0.3         | #            | #            | 1    | AG     |
| 107.6    | 60.2      | 172.3    | 76.0      | #         | 0.3         | 0.2          | 0.3         | 0.3          | #            | 1    | T      |
| 121.4    | 60.5      | 174.4    | 35.5      | 20.5      | 0.4         | 0.3          | 0.4         | 0.2          | 0.4          | 1    | V      |
| 125.2    | 60.9      | 174.1    | 35.0      | 20.8      | 0.3         | 0.2          | 0.3         | 0.2          | 0.4          | 1    | V      |
| 124.4    | 61.2      | 174.0    | 35.0      | 22.0      | 0.4         | 0.2          | 0.3         | 0.2          | 0.4          | 1    | V      |
| 123.5    | 54.0      | 173.0    | 31.8      | #         | 0.6         | 0.2          | 0.3         | 0.3          | #            | 1    | E      |
| 118.6    | 58.8      | 170.0    | 33.4      | #         | 0.3         | 0.2          | 0.3         | 0.5          | #            | 1    | V      |
| 122.9    | 53.9      | 175.1    | #         | #         | 0.3         | 0.2          | 0.3         | #            | #            | 1    | M      |
| 121.4    | 59.5      | 174.6    | 36.5      | 20.8      | 0.4         | 0.5          | 0.4         | 0.3          | 0.3          | 1    | V      |

## NCOCX spectrum

| $\nu(\text{N})$ | $\nu(\text{Ca})$ | $\nu(\text{C})$ | $\nu(\text{Cb})$ | $\nu(\text{Cg})$ | $\delta(\text{N})$ | $\delta(\text{Ca})$ | $\delta(\text{C})$ | $\delta(\text{Cb})$ | $\delta(\text{Cg})$ | deg. | type   |
|-----------------|------------------|-----------------|------------------|------------------|--------------------|---------------------|--------------------|---------------------|---------------------|------|--------|
| 113.7           | 56.2             | 173.9           | #                | #                | 0.3                | 0.2                 | 0.3                | #                   | #                   | 1    | K      |
| 103.6           | 54.0             | 174.8           | 42.2             | #                | 0.5                | 0.2                 | 0.3                | 0.4                 | #                   | 1    | M      |
| 114.0           | 45.5             | 171.2           | #                | #                | 0.3                | 0.2                 | 0.3                | #                   | #                   | 1    | G      |
| 117.1           | 61.4             | 173.5           | 71.2             | 21.1             | 0.3                | 0.2                 | 0.3                | 0.4                 | 0.4                 | 1    | T      |
| 122.1           | 60.9             | 173.0           | 69.1             | #                | 0.3                | 0.2                 | 0.3                | 0.2                 | #                   | 1    | T      |
| 121.0           | 54.5             | 174.4           | #                | #                | 0.3                | 0.2                 | 0.3                | #                   | #                   | 1    | L      |
| 118.0           | 50.1             | 174.5           | 20.5             | #                | 0.3                | 0.2                 | 0.3                | 0.3                 | #                   | 1    | A      |
| 124.5           | 61.3             | 172.6           | 67.9             | #                | 0.3                | 0.2                 | 0.3                | 0.2                 | #                   | 1    | T      |
| 120.5           | 49.4             | 174.0           | 23.5             | #                | 0.3                | 0.2                 | 0.3                | 0.3                 | #                   | 1    | A      |
| 120.6           | 50.0             | 174.4           | #                | #                | 0.3                | 0.2                 | 0.3                | #                   | #                   | 1    | A      |
| 113.3           | 54.9             | 173.7           | 32.7             | #                | 0.3                | 0.2                 | 0.3                | 0.4                 | #                   | 1    | R      |
| 125.3           | 60.4             | 174.3           | 41.2             | #                | 0.3                | 0.2                 | 0.3                | 0.4                 | #                   | 1    | I      |
| 125.0           | 56.5             | 173.5           | 63.3             | #                | 0.4                | 0.3                 | 0.4                | 0.4                 | #                   | 1    | S      |
| 121.8           | 60.8             | 174.6           | #                | #                | 0.3                | 0.2                 | 0.3                | #                   | #                   | 1    | V      |
| 118.1           | 61.6             | 172.6           | #                | #                | 0.4                | 0.3                 | 0.4                | #                   | #                   | 1    | T      |
| 121.5           | 56.5             | 172.8           | 65.2             | #                | 0.5                | 0.2                 | 0.3                | 0.3                 | #                   | 1    | S      |
| 117.6           | 54.2             | 175.3           | 64.3             | #                | 0.3                | 0.2                 | 0.3                | 0.3                 | #                   | 1    | S      |
| 116.3           | 59.2             | 175.0           | #                | #                | 0.4                | 0.2                 | 0.3                | #                   | #                   | 1    | V      |
| 122.1           | 62.1             | 173.9           | #                | #                | 0.3                | 0.2                 | 0.3                | #                   | #                   | 1    | P      |
| 122.9           | 55.2             | 173.0           | 64.5             | #                | 0.3                | 0.2                 | 0.3                | 0.4                 | #                   | 1    | S      |
| 122.1           | 60.6             | 173.4           | #                | #                | 0.4                | 0.3                 | 0.4                | #                   | #                   | 1    | V      |
| 123.2           | 53.9             | 174.5           | #                | #                | 0.3                | 0.2                 | 0.3                | #                   | #                   | 1    | E      |
| 119.0           | 53.7             | 174.9           | 33.8             | #                | 0.4                | 0.2                 | 0.4                | 0.4                 | #                   | 1    | QEMKRW |
| 122.3           | 54.0             | 173.9           | #                | #                | 0.3                | 0.2                 | 0.3                | #                   | #                   | 1    | QE     |
| 121.3           | 61.2             | 174.0           | 71.0             | #                | 0.3                | 0.2                 | 0.3                | 0.3                 | #                   | 1    | T      |
| 121.2           | 61.6             | 173.2           | 70.5             | #                | 0.4                | 0.3                 | 0.4                | 0.2                 | #                   | 1    | T      |
| 124.1           | 61.3             | 172.6           | 70.2             | #                | 0.3                | 0.2                 | 0.3                | 0.2                 | #                   | 1    | T      |
| 118.8           | 61.1             | 175.2           | #                | #                | 0.4                | 0.3                 | 0.4                | #                   | #                   | 1    | V      |
| 119.7           | 53.6             | 174.6           | 32.0             | #                | 0.3                | 0.2                 | 0.3                | 0.4                 | #                   | 1    | QEMKRW |
| 107.8           | 49.3             | 172.9           | #                | #                | 0.3                | 0.2                 | 0.3                | #                   | #                   | 1    | AG     |
| 118.0           | 60.4             | 172.3           | #                | #                | 0.3                | 0.2                 | 0.3                | #                   | #                   | 1    | VPT    |
| 122.6           | 60.8             | 174.2           | 35.2             | #                | 0.3                | 0.2                 | 0.3                | 0.4                 | #                   | 1    | V      |
| 118.6           | 60.9             | 174.1           | 34.6             | #                | 0.3                | 0.2                 | 0.3                | 0.4                 | #                   | 1    | V      |
| 124.1           | 53.9             | 173.0           | #                | #                | 0.4                | 0.2                 | 0.3                | #                   | #                   | 1    | E      |
| 121.0           | 59.9             | 174.6           | 35.9             | #                | 0.4                | 0.3                 | 0.4                | 0.4                 | #                   | 1    | V      |
| 116.9           | 61.4             | 174.0           | #                | #                | 0.3                | 0.2                 | 0.3                | #                   | #                   | 1    | V      |
| 109.6           | 53.9             | 174.8           | #                | #                | 0.5                | 0.4                 | 0.4                | #                   | #                   | 1    | M      |



## CONCA spectrum

| $\nu(\text{N})$ | $\nu(\text{Ca})$ | $\nu(\text{C})$ | $\nu(\text{Cb})$ | $\nu(\text{Cg})$ | $\delta(\text{N})$ | $\delta(\text{Ca})$ | $\delta(\text{C})$ | $\delta(\text{Cb})$ | $\delta(\text{Cg})$ | deg. | type   |
|-----------------|------------------|-----------------|------------------|------------------|--------------------|---------------------|--------------------|---------------------|---------------------|------|--------|
| 113.9           | 56.2             | 173.8           | #                | #                | 0.4                | 0.2                 | 0.3                | #                   | #                   | 1    | K      |
| 113.9           | 59.0             | 173.7           | #                | #                | 0.3                | 0.2                 | 0.3                | #                   | #                   | 1    | V      |
| 118.6           | 53.8             | 174.3           | #                | #                | 0.3                | 0.2                 | 0.3                | #                   | #                   | 1    | M      |
| 104.1           | 45.4             | 174.9           | #                | #                | 0.4                | 0.2                 | 0.3                | #                   | #                   | 1    | G      |
| 114.1           | 61.4             | 171.3           | #                | #                | 0.3                | 0.2                 | 0.3                | #                   | #                   | 1    | T      |
| 117.1           | 60.8             | 173.5           | #                | #                | 0.3                | 0.2                 | 0.3                | #                   | #                   | 1    | T      |
| 122.1           | 54.6             | 173.4           | #                | #                | 0.3                | 0.2                 | 0.3                | #                   | #                   | 1    | L      |
| 121.0           | 50.1             | 174.3           | #                | #                | 0.3                | 0.2                 | 0.3                | #                   | #                   | 1    | A      |
| 118.1           | 53.9             | 174.4           | #                | #                | 0.3                | 0.2                 | 0.3                | #                   | #                   | 1    | E      |
| 118.4           | 61.2             | 172.5           | #                | #                | 0.3                | 0.2                 | 0.3                | #                   | #                   | 1    | T      |
| 124.6           | 49.4             | 172.4           | #                | #                | 0.3                | 0.2                 | 0.3                | #                   | #                   | 1    | A      |
| 120.6           | 50.1             | 173.9           | 21.9             | #                | 0.3                | 0.2                 | 0.3                | 0.4                 | #                   | 1    | A      |
| 117.8           | 61.1             | 172.9           | #                | #                | 0.3                | 0.2                 | 0.3                | #                   | #                   | 1    | VT     |
| 121.9           | 60.4             | 173.1           | #                | #                | 0.3                | 0.2                 | 0.3                | #                   | #                   | 1    | I      |
| 124.4           | 60.9             | 173.8           | #                | #                | 0.4                | 0.3                 | 0.4                | #                   | #                   | 1    | V      |
| 121.8           | 54.8             | 174.4           | #                | #                | 0.3                | 0.2                 | 0.3                | #                   | #                   | 1    | QEKRMW |
| 122.3           | 61.6             | 173.8           | #                | #                | 0.3                | 0.2                 | 0.3                | #                   | #                   | 1    | V      |
| 122.1           | 53.6             | 173.8           | #                | #                | 0.3                | 0.2                 | 0.3                | #                   | #                   | 1    | QEMKRW |
| 120.0           | 56.5             | 173.6           | #                | #                | 0.3                | 0.2                 | 0.3                | #                   | #                   | 1    | S      |
| 114.5           | 54.2             | 173.5           | #                | #                | 0.3                | 0.2                 | 0.3                | #                   | #                   | 1    | S      |
| 116.8           | 61.9             | 174.9           | #                | #                | 0.4                | 0.2                 | 0.3                | #                   | #                   | 1    | P      |
| 116.8           | 55.1             | 173.9           | #                | #                | 0.3                | 0.2                 | 0.3                | #                   | #                   | 1    | S      |
| 122.4           | 60.9             | 173.9           | #                | #                | 0.4                | 0.3                 | 0.4                | #                   | #                   | 1    | V      |
| 123.1           | 54.3             | 174.8           | #                | #                | 0.3                | 0.4                 | 0.3                | #                   | #                   | 1    | M      |
| 121.6           | 61.3             | 174.3           | #                | #                | 0.4                | 0.4                 | 0.4                | #                   | #                   | 1    | VT     |
| 121.8           | 61.4             | 173.4           | #                | #                | 0.6                | 0.6                 | 0.6                | #                   | #                   | 1    | T      |
| 121.0           | 60.8             | 174.6           | #                | #                | 0.3                | 0.2                 | 0.3                | #                   | #                   | 1    | V      |
| 123.2           | 54.0             | 173.3           | #                | #                | 0.3                | 0.2                 | 0.3                | #                   | #                   | 1    | E      |
| 118.0           | 49.3             | 175.5           | #                | #                | 0.3                | 0.2                 | 0.3                | #                   | #                   | 1    | AG     |
| 107.9           | 60.2             | 172.8           | #                | #                | 0.3                | 0.2                 | 0.3                | #                   | #                   | 1    | TP     |
| 124.4           | 60.9             | 173.4           | #                | #                | 0.3                | 0.2                 | 0.3                | #                   | #                   | 1    | V      |
| 125.4           | 61.0             | 174.3           | #                | #                | 0.3                | 0.2                 | 0.3                | #                   | #                   | 1    | V      |
| 121.2           | 59.1             | 174.5           | #                | #                | 0.4                | 0.3                 | 0.4                | #                   | #                   | 1    | V      |
| 118.5           | 58.8             | 175.0           | #                | #                | 0.4                | 0.3                 | 0.4                | #                   | #                   | 1    | V      |
| 109.4           | 54.0             | 174.8           | #                | #                | 0.5                | 0.4                 | 0.5                | #                   | #                   | 1    | S      |
| 120.3           | 53.8             | 174.4           | #                | #                | 0.5                | 0.4                 | 0.5                | #                   | #                   | 1    | Q      |

Table S2: Signals from 3D solid state NMR spectra of P2 fibrils, used as input for MCASSIGN2. Each row is one multidimensional signal. Columns are chemical shifts (in ppm) of backbone amide nitrogens,  $\alpha$ -carbons, carbonyl carbons,  $\beta$ -carbons, and  $\gamma$ -carbons, uncertainties in the chemical shifts, signal degeneracies, and possible residue-type assignments. Absent values are indicated by #.

NCACX spectrum

| $\nu(N)$ | $\nu(Ca)$ | $\nu(C)$ | $\nu(Cb)$ | $\nu(Cg)$ | $\delta(N)$ | $\delta(Ca)$ | $\delta(C)$ | $\delta(Cb)$ | $\delta(Cg)$ | deg. | type   |
|----------|-----------|----------|-----------|-----------|-------------|--------------|-------------|--------------|--------------|------|--------|
| 129.7    | 54.2      | 175.6    | 44.9      | 29.1      | 0.3         | 0.2          | 0.3         | 0.3          | 0.3          | 1    | L      |
| 118.3    | 55.7      | 174.7    | 64.4      | #         | 0.3         | 0.2          | 0.3         | 0.2          | #            | 1    | S      |
| 108.4    | 47.8      | 172.3    | #         | #         | 0.3         | 0.2          | 0.3         | #            | #            | 1    | G      |
| 116.9    | 49.6      | 176.5    | 17.1      | #         | 0.3         | 0.2          | 0.3         | 0.2          | #            | 1    | A      |
| 119.4    | 59.8      | 177.3    | 27.2      | 35.1      | 0.3         | 0.2          | 0.3         | 0.3          | 0.3          | 1    | Q      |
| 124.7    | 61.4      | 175.8    | 33.5      | 21.9      | 0.3         | 0.2          | 0.3         | 0.3          | 0.3          | 1    | V      |
| 114.0    | 56.3      | 173.7    | 29.3      | #         | 0.3         | 0.2          | 0.3         | 0.6          | #            | 1    | WQEKR  |
| 119.2    | 53.4      | 174.3    | 33.3      | #         | 0.3         | 0.2          | 0.3         | 0.6          | #            | 1    | QEMKR  |
| 125.4    | 54.1      | 173.8    | #         | #         | 0.3         | 0.2          | 0.3         | #            | #            | 1    | QEMKR  |
| 125.6    | 61.2      | 174.1    | 35.4      | 21.5      | 0.4         | 0.2          | 0.3         | 0.3          | 0.3          | 1    | V      |
| 125.6    | 61.1      | 175.5    | 42.4      | 28.6      | 0.3         | 0.2          | 0.3         | 0.3          | 0.3          | 1    | I      |
| 114.7    | 48.7      | 173.7    | #         | #         | 0.3         | 0.2          | 0.3         | #            | #            | 1    | G      |
| 121.8    | 62.2      | 174.0    | 70.4      | #         | 0.3         | 0.2          | 0.3         | 0.4          | #            | 1    | T      |
| 125.1    | 49.5      | 175.2    | 24.2      | #         | 0.3         | 0.2          | 0.3         | 0.2          | #            | 1    | A      |
| 125.8    | 50.1      | 175.2    | 21.4      | #         | 0.3         | 0.2          | 0.3         | 0.2          | #            | 1    | A      |
| 117.2    | 61.6      | 173.9    | 70.6      | 21.3      | 0.3         | 0.2          | 0.3         | 0.5          | 0.4          | 1    | T      |
| 123.2    | 62.2      | 171.1    | 71.6      | 21.8      | 0.3         | 0.2          | 0.3         | 0.4          | 0.4          | 1    | T      |
| 125.7    | 61.7      | 173.9    | 69.5      | 20.9      | 0.3         | 0.2          | 0.3         | 0.4          | 0.3          | 1    | T      |
| 112.4    | 60.5      | 174.7    | 36.0      | 21.4      | 0.3         | 0.2          | 0.3         | 0.3          | 0.3          | 1    | V      |
| 115.1    | 53.9      | 175.5    | 65.7      | #         | 0.3         | 0.2          | 0.3         | 0.5          | #            | 1    | S      |
| 117.0    | 55.7      | 172.7    | 65.1      | #         | 0.3         | 0.2          | 0.3         | 0.3          | #            | 1    | S      |
| 124.8    | 61.8      | 173.7    | 70.2      | 21.5      | 0.4         | 0.2          | 0.3         | 0.3          | 0.8          | 1    | T      |
| 125.3    | 61.6      | 174.9    | 33.4      | 20.7      | 0.3         | 0.2          | 0.3         | 0.3          | 0.3          | 1    | V      |
| 116.8    | 53.7      | 173.7    | 32.9      | #         | 0.3         | 0.2          | 0.3         | 0.5          | #            | 1    | QEMKR  |
| 123.8    | 49.1      | 175.2    | 22.9      | #         | 0.3         | 0.2          | 0.3         | 0.2          | #            | 1    | A      |
| 118.0    | 63.2      | #        | #         | #         | 0.5         | 0.2          | #           | #            | #            | 1    | P      |
| 121.3    | 54.0      | 175.1    | 32.5      | #         | 0.3         | 0.2          | 0.3         | 0.6          | #            | 1    | QEMKRW |
| 124.2    | 61.5      | 174.4    | 69.8      | 22.6      | 0.3         | 0.2          | 0.3         | 0.3          | 0.3          | 1    | T      |
| 125.6    | 54.1      | 173.8    | 45.1      | 28.5      | 0.3         | 0.2          | 0.3         | 0.6          | 0.4          | 1    | L      |
| 114.2    | 61.3      | #        | #         | #         | 0.3         | 0.2          | #           | #            | #            | 1    | VIT    |
| 108.4    | 48.7      | 174.3    | #         | #         | 0.3         | 0.2          | 0.3         | #            | #            | 1    | G      |
| 119.1    | 54.2      | 174.7    | 37.9      | #         | 0.3         | 0.2          | 0.3         | 0.5          | #            | 1    | MQE    |

## NCOCX spectrum

| $\nu(\text{N})$ | $\nu(\text{Ca})$ | $\nu(\text{C})$ | $\nu(\text{Cb})$ | $\nu(\text{Cg})$ | $\delta(\text{N})$ | $\delta(\text{Ca})$ | $\delta(\text{C})$ | $\delta(\text{Cb})$ | $\delta(\text{Cg})$ | deg. | type   |
|-----------------|------------------|-----------------|------------------|------------------|--------------------|---------------------|--------------------|---------------------|---------------------|------|--------|
| 118.2           | 54.2             | 175.4           | 44.9             | 28.9             | 0.3                | 0.2                 | 0.3                | 0.4                 | 0.5                 | 1    | L      |
| 108.6           | 55.8             | 174.7           | 64.4             | #                | 0.3                | 0.2                 | 0.3                | 0.3                 | #                   | 1    | S      |
| 121.6           | 47.7             | 172.2           | #                | #                | 0.3                | 0.2                 | 0.3                | #                   | #                   | 1    | G      |
| 119.5           | 49.7             | 176.6           | 17.1             | #                | 0.3                | 0.2                 | 0.3                | 0.2                 | #                   | 1    | A      |
| 124.7           | 59.8             | 177.3           | 27.2             | 35.1             | 0.3                | 0.2                 | 0.3                | 0.3                 | 0.5                 | 1    | Q      |
| 125.9           | 61.4             | 175.8           | 33.5             | 21.7             | 0.3                | 0.2                 | 0.3                | 0.4                 | 0.4                 | 1    | V      |
| 112.2           | 56.3             | 173.6           | #                | #                | 0.3                | 0.2                 | 0.3                | #                   | #                   | 1    | WQEKR  |
| 114.4           | 53.3             | 174.2           | 33.4             | #                | 0.3                | 0.2                 | 0.3                | 0.5                 | #                   | 1    | QEMKR  |
| 125.4           | 61.4             | 173.8           | 35.3             | #                | 0.3                | 0.2                 | 0.3                | 0.4                 | #                   | 1    | V      |
| 125.9           | 54.1             | 173.8           | 33.0             | #                | 0.3                | 0.2                 | 0.3                | 0.5                 | #                   | 1    | QEMKRW |
| 125.7           | 61.1             | 175.5           | 42.3             | 28.6             | 0.3                | 0.2                 | 0.3                | 0.4                 | 0.5                 | 1    | I      |
| 101.9           | 48.6             | 173.6           | #                | #                | 0.3                | 0.2                 | 0.3                | #                   | #                   | 1    | G      |
| 116.9           | 49.6             | 175.1           | 24.1             | #                | 0.3                | 0.2                 | 0.3                | 0.4                 | #                   | 1    | A      |
| 116.9           | 50.1             | 175.0           | 21.3             | #                | 0.3                | 0.2                 | 0.3                | 0.4                 | #                   | 1    | A      |
| 121.8           | 61.8             | 173.7           | 71.3             | 21.5             | 0.3                | 0.2                 | 0.3                | 0.5                 | 0.4                 | 1    | T      |
| 125.3           | 62.3             | 171.3           | 71.6             | 21.8             | 0.3                | 0.2                 | 0.3                | 0.3                 | 0.3                 | 1    | T      |
| 125.2           | 61.5             | 174.1           | 69.4             | 20.9             | 0.3                | 0.2                 | 0.3                | 0.4                 | 0.5                 | 1    | T      |
| 121.3           | 60.4             | 174.8           | 35.7             | 21.3             | 0.3                | 0.2                 | 0.3                | 0.4                 | 0.5                 | 1    | V      |
| 114.7           | 54.0             | 175.3           | 65.8             | #                | 0.3                | 0.2                 | 0.4                | 0.3                 | #                   | 1    | S      |
| 125.5           | 55.6             | 172.8           | 64.8             | #                | 0.3                | 0.2                 | 0.3                | 0.3                 | #                   | 1    | S      |
| 123.5           | 62.3             | 174.2           | 70.2             | 20.6             | 0.3                | 0.2                 | 0.3                | 0.4                 | 0.4                 | 1    | T      |
| 117.2           | 61.2             | 173.9           | 33.0             | 21.6             | 0.4                | 0.2                 | 0.3                | 0.5                 | 0.4                 | 1    | V      |
| 124.3           | 61.6             | 173.7           | 70.2             | 21.5             | 0.4                | 0.2                 | 0.3                | 0.5                 | 0.6                 | 1    | T      |
| 129.6           | 61.4             | 174.7           | 33.4             | 20.6             | 0.3                | 0.2                 | 0.3                | 0.3                 | 0.3                 | 1    | V      |
| 119.0           | 53.7             | 173.7           | 32.8             | #                | 0.3                | 0.2                 | 0.3                | 0.5                 | #                   | 1    | QEMKR  |
| 125.7           | 54.1             | 173.8           | 45.7             | #                | 0.3                | 0.2                 | 0.3                | 0.4                 | #                   | 1    | L      |
| 116.9           | 49.2             | 175.1           | 22.8             | #                | 0.3                | 0.2                 | 0.3                | 0.4                 | #                   | 1    | A      |
| 118.5           | 61.3             | 174.8           | 69.8             | 22.6             | 0.3                | 0.2                 | 0.3                | 0.4                 | 0.4                 | 1    | T      |
| 123.5           | 63.4             | 172.2           | #                | #                | 0.3                | 0.2                 | 0.3                | #                   | #                   | 1    | P      |
| 119.1           | 61.4             | 174.3           | 69.8             | 22.5             | 0.3                | 0.2                 | 0.3                | 0.3                 | 0.3                 | 1    | T      |
| 124.8           | 61.8             | 172.4           | 71.2             | #                | 0.4                | 0.3                 | 0.4                | 0.4                 | #                   | 1    | T      |

## CONCA spectrum

| $\nu(\text{N})$ | $\nu(\text{Ca})$ | $\nu(\text{C})$ | $\nu(\text{Cb})$ | $\nu(\text{Cg})$ | $\delta(\text{N})$ | $\delta(\text{Ca})$ | $\delta(\text{C})$ | $\delta(\text{Cb})$ | $\delta(\text{Cg})$ | deg. | type    |
|-----------------|------------------|-----------------|------------------|------------------|--------------------|---------------------|--------------------|---------------------|---------------------|------|---------|
| 129.6           | 54.2             | 174.7           | 45.2             | #                | 0.3                | 0.2                 | 0.3                | 0.4                 | #                   | 1    | L       |
| 118.5           | 55.8             | 175.3           | 64.4             | #                | 0.3                | 0.2                 | 0.3                | 0.5                 | #                   | 1    | S       |
| 108.5           | 47.7             | 174.7           | #                | #                | 0.3                | 0.2                 | 0.3                | #                   | #                   | 1    | G       |
| 116.8           | 49.6             | 175.1           | #                | #                | 0.3                | 0.2                 | 0.3                | #                   | #                   | 1    | A       |
| 119.5           | 59.8             | 176.5           | #                | #                | 0.3                | 0.2                 | 0.3                | #                   | #                   | 1    | Q       |
| 124.5           | 61.5             | 177.4           | 33.5             | #                | 0.3                | 0.2                 | 0.3                | 0.4                 | #                   | 1    | V       |
| 112.2           | 60.4             | 173.6           | 36.0             | #                | 0.3                | 0.2                 | 0.3                | 0.4                 | #                   | 1    | V       |
| 119.0           | 53.4             | 174.2           | #                | #                | 0.3                | 0.2                 | 0.3                | #                   | #                   | 1    | QEMKR   |
| 126.1           | 61.4             | 175.7           | 35.3             | #                | 0.4                | 0.2                 | 0.3                | 0.4                 | #                   | 1    | V       |
| 125.5           | 61.0             | 172.4           | 42.3             | 28.5             | 0.3                | 0.2                 | 0.3                | 0.5                 | 0.4                 | 1    | I       |
| 121.5           | 62.1             | 173.9           | #                | #                | 0.3                | 0.2                 | 0.3                | #                   | #                   | 1    | VT      |
| 114.6           | 48.6             | 175.8           | #                | #                | 0.3                | 0.2                 | 0.4                | #                   | #                   | 1    | G       |
| 124.9           | 49.4             | 171.2           | #                | #                | 0.3                | 0.2                 | 0.3                | #                   | #                   | 1    | A       |
| 125.8           | 50.1             | 173.6           | 21.1             | #                | 0.3                | 0.2                 | 0.3                | 0.4                 | #                   | 1    | A       |
| 114.0           | 56.3             | 174.2           | #                | #                | 0.3                | 0.2                 | 0.3                | #                   | #                   | 1    | SMEQWKR |
| 123.1           | 62.1             | 174.0           | 71.5             | #                | 0.3                | 0.2                 | 0.3                | 0.4                 | #                   | 1    | T       |
| 126.0           | 61.5             | 175.7           | 69.3             | #                | 0.3                | 0.2                 | 0.3                | 0.4                 | #                   | 1    | T       |
| 125.6           | 61.5             | 173.8           | 33.3             | #                | 0.3                | 0.2                 | 0.3                | 0.4                 | #                   | 1    | V       |
| 121.5           | 62.4             | 172.2           | #                | #                | 0.3                | 0.2                 | 0.3                | #                   | #                   | 1    | TV      |
| 125.9           | 53.9             | 173.4           | 45.7             | #                | 0.3                | 0.2                 | 0.3                | 0.7                 | #                   | 1    | L       |
| 125.4           | 61.6             | 173.9           | #                | #                | 0.8                | 0.8                 | 0.8                | #                   | #                   | 1    | VT      |
| 123.9           | 49.2             | 171.8           | #                | #                | 0.3                | 0.2                 | 0.3                | #                   | #                   | 1    | A       |
| 116.6           | 53.7             | 175.3           | #                | #                | 0.3                | 0.2                 | 0.3                | #                   | #                   | 1    | LQEMWKR |
| 117.1           | 56.6             | 175.4           | #                | #                | 0.3                | 0.2                 | 0.3                | #                   | #                   | 1    | SQEMWKR |
| 117.0           | 61.8             | 174.2           | #                | #                | 0.3                | 0.2                 | 0.3                | #                   | #                   | 1    | VT      |
| 118.3           | 63.1             | 175.2           | #                | #                | 0.3                | 0.2                 | 0.3                | #                   | #                   | 1    | PT      |
| 121.7           | 54.1             | 174.7           | #                | #                | 0.3                | 0.2                 | 0.3                | #                   | #                   | 1    | QEMKRW  |
| 125.2           | 54.0             | 171.8           | #                | #                | 0.3                | 0.2                 | 0.3                | #                   | #                   | 1    | MQEWKR  |
| 119.3           | 54.2             | 173.6           | #                | #                | 0.3                | 0.2                 | 0.3                | #                   | #                   | 1    | MQE     |
| 124.3           | 61.2             | 173.5           | 69.8             | #                | 0.3                | 0.2                 | 0.3                | 0.5                 | #                   | 1    | T       |
| 116.9           | 55.6             | 173.8           | #                | #                | 0.3                | 0.2                 | 0.3                | #                   | #                   | 1    | SQEMWKR |
| 114.0           | 61.2             | 176.6           | #                | #                | 0.3                | 0.2                 | 0.3                | #                   | #                   | 1    | VIT     |
| 115.3           | 54.2             | 175.0           | #                | #                | 0.3                | 0.2                 | 0.3                | #                   | #                   | 1    | S       |
| 125.5           | 61.5             | 173.7           | 69.7             | #                | 0.3                | 0.2                 | 0.3                | 0.4                 | #                   | 1    | T       |
| 108.8           | 48.5             | 174.7           | #                | #                | 0.4                | 0.4                 | 0.4                | #                   | #                   | 1    | G       |

Table S3: Signals from 3D solid state NMR spectra of P3 fibrils, used as input for MCASSIGN2. Each row is one multidimensional signal. Columns are chemical shifts (in ppm) of backbone amide nitrogens,  $\alpha$ -carbons, carbonyl carbons,  $\beta$ -carbons, and  $\gamma$ -carbons, uncertainties in the chemical shifts, signal degeneracies, and possible residue-type assignments. Absent values are indicated by #.

NCACX spectrum

| $\nu(N)$ | $\nu(Ca)$ | $\nu(C)$ | $\nu(Cb)$ | $\nu(Cg)$ | $\delta(N)$ | $\delta(Ca)$ | $\delta(C)$ | $\delta(Cb)$ | $\delta(Cg)$ | deg. | type   |
|----------|-----------|----------|-----------|-----------|-------------|--------------|-------------|--------------|--------------|------|--------|
| 117.1    | 61.6      | 173.3    | 70.7      | 20.8      | 0.3         | 0.3          | 0.2         | 0.4          | 0.4          | 1    | T      |
| 108.6    | 44.0      | 172.2    | #         | #         | 0.3         | 0.1          | 0.1         | #            | #            | 1    | G      |
| 114.4    | 53.7      | 174.3    | 39.5      | #         | 0.3         | 0.1          | 0.1         | 0.3          | #            | 1    | MQE    |
| 115.5    | 58.7      | 169.8    | 68.7      | 22.4      | 0.3         | 0.3          | 0.3         | 0.3          | 0.3          | 1    | T      |
| 131.8    | 60.9      | #        | #         | #         | 0.3         | 0.3          | #           | #            | #            | 1    | P      |
| 120.6    | 50.4      | 175.1    | 21.1      | #         | 0.3         | 0.2          | 0.2         | 0.2          | #            | 1    | A      |
| 117.6    | 60.4      | 176.1    | 35.8      | 22.4      | 0.3         | 0.3          | 0.3         | 0.3          | 0.3          | 1    | V      |
| 123.9    | 56.2      | 173.7    | 63.2      | #         | 0.3         | 0.1          | 0.3         | 0.3          | #            | 1    | S      |
| 124.6    | 59.9      | 173.7    | 41.6      | #         | 0.3         | 0.5          | 0.3         | 0.3          | #            | 1    | I      |
| 122.7    | 53.8      | 174.9    | 43.9      | #         | 0.3         | 0.4          | 1.2         | 0.4          | #            | 1    | L      |
| 112.8    | 55.4      | 177.2    | 64.8      | #         | 0.3         | 0.4          | 0.4         | 0.4          | #            | 1    | S      |
| 116.0    | 48.6      | 174.6    | #         | #         | 0.3         | 0.3          | 0.2         | #            | #            | 1    | G      |
| 119.5    | 60.8      | 173.6    | 70.9      | 21.1      | 0.3         | 0.2          | 0.2         | 0.3          | 0.3          | 1    | T      |
| 121.9    | 52.0      | 172.3    | 16.0      | #         | 0.3         | 0.2          | 0.2         | 0.4          | #            | 1    | A      |
| 116.4    | 49.3      | 175.5    | 23.0      | #         | 0.3         | 0.1          | 0.3         | 0.4          | #            | 1    | A      |
| 120.4    | 60.8      | 172.5    | 71.9      | 21.8      | 0.5         | 0.2          | 0.2         | 0.3          | 0.3          | 1    | T      |
| 122.7    | 49.5      | 174.9    | 23.0      | #         | 0.3         | 0.1          | 0.3         | 0.4          | #            | 1    | A      |
| 118.6    | 52.9      | 170.8    | 29.6      | #         | 0.3         | 0.4          | 0.4         | 0.4          | #            | 1    | QE     |
| 112.5    | 56.5      | 174.2    | 65.0      | #         | 0.3         | 0.1          | 0.3         | 0.3          | #            | 1    | S      |
| 110.8    | 45.3      | 173.2    | #         | #         | 0.3         | 0.2          | 0.4         | #            | #            | 1    | G      |
| 117.0    | 61.4      | 173.2    | 70.7      | 20.8      | 0.4         | 0.2          | 0.2         | 0.3          | 0.3          | 1    | T      |
| 119.3    | 58.5      | 170.4    | 33.4      | 22.6      | 0.3         | 0.3          | 0.3         | 0.3          | 0.3          | 1    | V      |
| 123.0    | 61.7      | 173.4    | 70.6      | 21.6      | 0.2         | 0.3          | 0.3         | 0.3          | 0.4          | 1    | T      |
| 119.5    | 56.8      | 174.0    | 63.1      | #         | 0.6         | 0.2          | 0.2         | 0.3          | #            | 1    | S      |
| 121.8    | 60.7      | 174.9    | 35.0      | 21.8      | 0.3         | 0.2          | 0.4         | 0.2          | 0.5          | 1    | V      |
| 120.5    | 50.7      | 175.2    | 22.8      | #         | 0.3         | 0.1          | 0.3         | 0.4          | #            | 1    | A      |
| 112.4    | 62.3      | 172.1    | 73.1      | 21.9      | 0.3         | 0.4          | 0.3         | 0.3          | 0.3          | 1    | T      |
| 123.1    | 61.3      | 173.5    | 34.9      | 21.6      | 0.3         | 0.3          | 0.4         | 0.2          | 0.4          | 1    | V      |
| 124.5    | 54.4      | 173.8    | 30.5      | #         | 0.3         | 0.6          | 0.4         | 0.4          | #            | 1    | QEMKRW |
| 117.5    | 54.5      | 176.4    | #         | #         | 0.3         | 0.3          | 0.4         | #            | #            | 1    | QE     |
| 123.0    | 53.8      | 173.7    | 32.2      | #         | 0.3         | 0.4          | 0.4         | 0.4          | #            | 1    | QEMKRW |
| 125.9    | 61.2      | 174.0    | 35.2      | 21.3      | 0.3         | 0.2          | 0.2         | 0.3          | 0.3          | 1    | V      |
| 122.5    | 53.9      | 173.9    | 34.2      | #         | 0.3         | 0.2          | 0.4         | 0.4          | #            | 1    | QEMKRW |
| 118.7    | 54.1      | 174.4    | 34.5      | #         | 0.3         | 0.4          | 0.4         | 0.6          | #            | 1    | QEMKRW |
| 125.5    | 61.1      | 174.2    | 35.3      | 21.4      | 0.3         | 0.2          | 0.2         | 0.3          | 0.4          | 1    | V      |
| 121.1    | 54.0      | 174.1    | 28.6      | #         | 0.3         | 0.4          | 0.4         | 0.3          | #            | 1    | QEKRW  |
| 111.9    | 45.0      | 173.1    | #         | #         | 0.3         | 0.3          | 0.3         | #            | #            | 1    | G      |
| 113.0    | 56.7      | 176.9    | #         | #         | 0.3         | 0.2          | 0.2         | #            | #            | 1    | QEKRWS |
| 123.3    | 61.5      | 173.0    | 70.6      | 20.5      | 0.3         | 0.2          | 0.2         | 0.4          | 0.4          | 1    | T      |
| 123.3    | 61.6      | 172.8    | 70.6      | 23.0      | 0.3         | 0.2          | 0.2         | 0.4          | 0.4          | 1    | T      |
| 123.0    | 61.7      | 173.4    | 70.6      | 20.6      | 0.3         | 0.3          | 0.3         | 0.3          | 0.4          | 1    | T      |

## NCOCX spectrum

| $\nu(\text{N})$ | $\nu(\text{Ca})$ | $\nu(\text{C})$ | $\nu(\text{Cb})$ | $\nu(\text{Cg})$ | $\delta(\text{N})$ | $\delta(\text{Ca})$ | $\delta(\text{C})$ | $\delta(\text{Cb})$ | $\delta(\text{Cg})$ | deg. | type   |
|-----------------|------------------|-----------------|------------------|------------------|--------------------|---------------------|--------------------|---------------------|---------------------|------|--------|
| 108.6           | 61.7             | 173.5           | 70.6             | 20.7             | 0.2                | 0.2                 | 0.2                | 0.4                 | 0.3                 | 1    | T      |
| 114.4           | 43.9             | 172.2           | #                | #                | 0.1                | 0.2                 | 0.1                | #                   | #                   | 1    | G      |
| 115.4           | 53.8             | 174.4           | 39.3             | #                | 0.2                | 0.2                 | 0.2                | 0.4                 | #                   | 1    | MQE    |
| 131.8           | 58.7             | 169.8           | 68.9             | #                | 0.2                | 0.2                 | 0.2                | 0.3                 | #                   | 1    | T      |
| 120.5           | 60.9             | 173.6           | 32.8             | 27.4             | 0.2                | 0.3                 | 0.2                | 0.3                 | 0.3                 | 1    | P      |
| 121.0           | 50.3             | 175.1           | 21.1             | #                | 0.2                | 0.2                 | 0.2                | 0.3                 | #                   | 1    | A      |
| 123.7           | 60.4             | 176.1           | 35.6             | 22.2             | 0.2                | 0.2                 | 0.2                | 0.3                 | 0.3                 | 1    | V      |
| 124.9           | 56.3             | 173.8           | 63.2             | #                | 0.3                | 0.2                 | 0.2                | 0.3                 | #                   | 1    | S      |
| 125.5           | 59.8             | 173.8           | 41.6             | 27.1             | 0.2                | 0.2                 | 0.2                | 0.2                 | 0.3                 | 1    | I      |
| 112.7           | 53.8             | 176.4           | 44.2             | #                | 0.2                | 0.2                 | 1.1                | 0.4                 | #                   | 1    | L      |
| 116.2           | 55.3             | 177.1           | 64.8             | #                | 0.6                | 0.2                 | 0.4                | 0.3                 | #                   | 1    | S      |
| 112.6           | 48.4             | 174.7           | #                | #                | 0.6                | 0.2                 | 0.2                | #                   | #                   | 1    | G      |
| 119.8           | 62.2             | 172.2           | 73.0             | 21.7             | 0.5                | 0.2                 | 0.2                | 0.2                 | 0.3                 | 1    | T      |
| 122.0           | 60.8             | 173.8           | 70.7             | 21.0             | 0.5                | 0.2                 | 0.2                | 0.4                 | 0.4                 | 1    | T      |
| 116.5           | 52.5             | 172.3           | #                | #                | 0.2                | 0.5                 | 0.2                | #                   | #                   | 1    | A      |
| 118.5           | 49.5             | 175.4           | 22.9             | #                | 0.4                | 0.4                 | 0.4                | 0.3                 | #                   | 1    | A      |
| 123.0           | 61.5             | 173.4           | 70.7             | 21.7             | 0.4                | 0.4                 | 0.4                | 0.5                 | 0.8                 | 1    | T      |
| 122.4           | 60.8             | 172.7           | 71.9             | 21.5             | 0.3                | 0.3                 | 0.2                | 0.3                 | 0.5                 | 1    | T      |
| 118.6           | 49.5             | 175.0           | 23.0             | #                | 0.2                | 0.2                 | 0.2                | 0.3                 | #                   | 1    | A      |
| 129.4           | 53.0             | 171.1           | #                | #                | 0.3                | 0.2                 | 0.2                | #                   | #                   | 1    | E      |
| 112.6           | 62.3             | 174.9           | 32.5             | #                | 0.2                | 0.2                 | 0.2                | 0.4                 | #                   | 1    | P      |
| 110.4           | 56.6             | 174.3           | 65.3             | #                | 0.4                | 0.2                 | 0.2                | 0.2                 | #                   | 1    | S      |
| 116.6           | 45.3             | 173.1           | #                | #                | 0.5                | 0.2                 | 0.5                | #                   | #                   | 1    | G      |
| 118.7           | 61.3             | 173.1           | #                | 21.2             | 0.2                | 0.5                 | 0.2                | #                   | 0.5                 | 1    | T      |
| 119.2           | 61.0             | 174.0           | 71.5             | 21.6             | 0.2                | 0.5                 | 0.2                | 0.5                 | 0.5                 | 1    | T      |
| 119.2           | 56.7             | 174.3           | 63.2             | #                | 0.4                | 0.2                 | 0.3                | 0.3                 | #                   | 1    | S      |
| 122.5           | 61.1             | 174.1           | 35.1             | #                | 0.4                | 0.4                 | 0.4                | 0.4                 | #                   | 1    | V      |
| 117.4           | 50.6             | 175.2           | 22.7             | #                | 0.4                | 0.2                 | 0.4                | 0.3                 | #                   | 1    | A      |
| 122.6           | 61.3             | 173.8           | 35.1             | 21.7             | 0.2                | 0.4                 | 0.3                | 0.4                 | 0.4                 | 1    | V      |
| 117.9           | 54.6             | 173.8           | 30.6             | #                | 0.2                | 0.2                 | 0.2                | 0.4                 | #                   | 1    | QEMKRW |
| 119.8           | 54.6             | 176.3           | #                | #                | 0.5                | 0.3                 | 0.5                | #                   | #                   | 1    | QE     |
| 112.9           | 53.4             | 174.0           | 32.2             | #                | 0.2                | 0.2                 | 0.2                | 0.4                 | #                   | 1    | QEMKRW |
| 123.6           | 54.1             | 173.9           | 34.5             | #                | 0.2                | 0.2                 | 0.2                | 0.4                 | #                   | 1    | QEMKRW |
| 125.9           | 61.0             | 174.0           | 35.2             | 21.3             | 0.2                | 0.2                 | 0.2                | 0.3                 | 0.3                 | 1    | V      |
| 117.4           | 54.0             | 174.1           | 28.6             | #                | 0.3                | 0.4                 | 0.2                | 0.3                 | #                   | 1    | QEKRW  |
| 122.3           | 44.8             | 173.1           | #                | #                | 0.2                | 0.2                 | 0.2                | #                   | #                   | 1    | G      |
| 123.3           | 60.6             | 175.4           | 35.3             | 22.2             | 0.4                | 0.2                 | 0.4                | 0.4                 | 0.4                 | 1    | V      |
| 119.6           | 56.6             | 176.9           | #                | #                | 0.2                | 0.2                 | 0.2                | #                   | #                   | 1    | QEKRWS |
| 122.0           | 54.2             | 174.4           | 35.0             | #                | 0.4                | 0.2                 | 0.4                | 0.6                 | #                   | 1    | QEMKRW |
| 123.0           | 61.6             | 173.4           | 70.9             | 20.6             | 0.4                | 0.4                 | 0.4                | 0.4                 | 0.3                 | 1    | T      |
| 123.2           | 61.5             | 172.6           | 70.7             | #                | 0.2                | 0.2                 | 0.4                | 0.4                 | #                   | 1    | T      |
| 123.2           | 61.5             | 172.8           | #                | 22.9             | 0.2                | 0.2                 | 0.2                | #                   | 0.4                 | 1    | T      |

## CONCA spectrum

| $\nu(N)$ | $\nu(Ca)$ | $\nu(C)$ | $\nu(Cb)$ | $\nu(Cg)$ | $\delta(N)$ | $\delta(Ca)$ | $\delta(C)$ | $\delta(Cb)$ | $\delta(Cg)$ | deg. | type    |
|----------|-----------|----------|-----------|-----------|-------------|--------------|-------------|--------------|--------------|------|---------|
| 117.1    | 61.5      | 175.4    | #         | #         | 0.3         | 0.3          | 0.3         | #            | #            | 1    | T       |
| 108.5    | 43.9      | 173.4    | #         | #         | 0.1         | 0.1          | 0.1         | #            | #            | 1    | G       |
| 114.4    | 53.8      | 172.3    | #         | #         | 0.1         | 0.1          | 0.1         | #            | #            | 1    | MQE     |
| 115.3    | 58.8      | 174.3    | #         | #         | 0.3         | 0.3          | 0.3         | #            | #            | 1    | T       |
| 131.6    | 60.7      | 169.8    | #         | #         | 0.3         | 0.3          | 0.3         | #            | #            | 1    | P       |
| 120.6    | 50.2      | 173.9    | #         | #         | 0.3         | 0.2          | 0.2         | #            | #            | 1    | A       |
| 121.1    | 54.0      | 175.0    | #         | #         | 0.3         | 0.3          | 0.3         | #            | #            | 1    | E       |
| 123.7    | 56.3      | 176.1    | #         | #         | 0.3         | 0.3          | 0.3         | #            | #            | 1    | S       |
| 124.7    | 60.0      | 173.9    | #         | #         | 0.3         | 0.3          | 0.3         | #            | #            | 1    | I       |
| 122.4    | 54.0      | 174.2    | #         | #         | 0.3         | 0.3          | 0.3         | #            | #            | 1    | L       |
| 112.8    | 55.5      | 176.5    | #         | #         | 0.3         | 0.3          | 1.2         | #            | #            | 1    | S       |
| 116.0    | 48.5      | 177.0    | #         | #         | 0.3         | 0.3          | 0.3         | #            | #            | 1    | G       |
| 112.3    | 62.3      | 174.8    | #         | #         | 0.3         | 0.3          | 0.3         | #            | #            | 1    | T       |
| 119.7    | 60.6      | 172.2    | #         | #         | 0.3         | 0.3          | 0.3         | #            | #            | 1    | T       |
| 121.7    | 52.2      | 173.8    | #         | #         | 0.3         | 0.3          | 0.3         | #            | #            | 1    | A       |
| 116.5    | 49.4      | 172.7    | #         | #         | 0.3         | 0.3          | 0.4         | #            | #            | 1    | A       |
| 122.6    | 49.4      | 172.5    | #         | #         | 0.3         | 0.3          | 0.3         | #            | #            | 1    | A       |
| 118.8    | 53.0      | 175.0    | #         | #         | 0.3         | 0.3          | 0.3         | #            | #            | 1    | QE      |
| 129.3    | 62.3      | 170.7    | #         | #         | 0.3         | 0.3          | 0.3         | #            | #            | 1    | P       |
| 112.7    | 56.6      | 174.7    | #         | #         | 0.3         | 0.3          | 0.3         | #            | #            | 1    | S       |
| 110.5    | 45.5      | 174.4    | #         | #         | 0.3         | 0.3          | 0.3         | #            | #            | 1    | G       |
| 117.0    | 61.5      | 173.5    | #         | #         | 0.3         | 0.3          | 0.3         | #            | #            | 1    | T       |
| 118.5    | 60.9      | 173.4    | #         | #         | 0.3         | 0.3          | 0.3         | #            | #            | 1    | T       |
| 119.3    | 56.8      | 173.9    | #         | #         | 0.3         | 0.3          | 0.3         | #            | #            | 1    | S       |
| 119.4    | 58.5      | 174.3    | #         | #         | 0.3         | 0.3          | 0.3         | #            | #            | 1    | V       |
| 123.0    | 61.8      | 173.7    | #         | #         | 0.3         | 0.3          | 0.3         | #            | #            | 1    | T       |
| 119.8    | 56.9      | 176.3    | #         | #         | 0.3         | 0.3          | 0.3         | #            | #            | 1    | S       |
| 120.4    | 50.9      | 175.7    | #         | #         | 0.3         | 0.3          | 0.3         | #            | #            | 1    | A       |
| 122.8    | 61.2      | 174.5    | #         | #         | 0.3         | 0.3          | 0.3         | #            | #            | 1    | V       |
| 119.4    | 61.0      | 176.9    | #         | #         | 0.3         | 0.3          | 0.3         | #            | #            | 1    | VT      |
| 122.1    | 60.6      | 174.3    | #         | #         | 0.3         | 0.3          | 0.3         | #            | #            | 1    | V       |
| 117.7    | 60.3      | 173.9    | #         | #         | 0.3         | 0.3          | 0.3         | #            | #            | 1    | V       |
| 122.5    | 53.8      | 173.3    | #         | #         | 0.3         | 0.3          | 0.3         | #            | #            | 1    | QEMKRWL |
| 124.4    | 54.8      | 172.5    | #         | #         | 0.3         | 0.3          | 0.3         | #            | #            | 1    | QEMKRW  |
| 122.8    | 61.6      | 173.1    | #         | #         | 0.3         | 0.3          | 0.3         | #            | #            | 1    | VT      |
| 117.7    | 54.4      | 174.8    | #         | #         | 0.3         | 0.3          | 0.3         | #            | #            | 1    | QEMKRW  |
| 125.8    | 61.0      | 174.2    | #         | #         | 0.3         | 0.3          | 0.3         | #            | #            | 1    | V       |
| 125.2    | 61.0      | 173.8    | #         | #         | 0.3         | 0.3          | 0.3         | #            | #            | 1    | V       |
| 123.1    | 53.4      | 172.6    | #         | #         | 0.3         | 0.3          | 0.3         | #            | #            | 1    | QEMKRW  |
| 111.6    | 45.2      | 174.7    | #         | #         | 0.3         | 0.3          | 0.3         | #            | #            | 1    | G       |
| 117.6    | 60.4      | 173.7    | #         | #         | 0.3         | 0.3          | 0.3         | #            | #            | 1    | VT      |

Table S4: Chemical shift assignments for backbone amide nitrogens, carbonyl carbons,  $\alpha$ -carbons, and  $\beta$ -carbons in P1 fibrils. Only assignments that were identical in all high-scoring MCASSIGN2 runs are listed.  $^{15}\text{N}$  shifts are relative to liquid  $\text{NH}_3$ .  $^{13}\text{C}$  shifts are relative to DSS. The last three columns are secondary shifts (relative to random coil values given by Wishart *et al.*, J. Biomolec. NMR **5**, 67-81, 1995).

| Residue | $\nu(\text{N})$ | $\nu(\text{C})$ | $\nu(\text{Ca})$ | $\nu(\text{Cb})$ | $\delta\delta(\text{C})$ | $\delta\delta(\text{Ca})$ | $\delta\delta(\text{Cb})$ |
|---------|-----------------|-----------------|------------------|------------------|--------------------------|---------------------------|---------------------------|
| T34     | 118.1           | 172.7           | 61.5             | 71.2             | -2.0                     | -0.4                      | 1.4                       |
| T35     | 118.0           | 172.6           | 61.2             | 70.2             | -2.1                     | -0.6                      | 0.4                       |
| S36     | 124.2           | 173.8           | 56.5             | 63.3             | -0.8                     | -1.8                      | -0.5                      |
| V37     | 124.7           | 175.2           | 61.0             | 34.9             | -1.1                     | -1.2                      | 2.0                       |
| Q38     | 118.8           | 174.8           | 54.5             | 31.2             | -1.2                     | -1.2                      | 1.8                       |
| V39     | 118.6           | 170.0           | 58.8             | 33.4             | -4.9                     | -1.0                      | 0.8                       |
| E63     | 121.5           | 173.7           | 54.5             | 33.8             | -2.9                     | -2.1                      | 3.9                       |
| K64     | 113.7           | 173.8           | 56.2             | 37.6             | -2.8                     | 0.0                       | 4.5                       |
| V65     | 113.9           | 174.9           | 59.1             | 36.6             | 0.0                      | -0.7                      | 3.7                       |
| P66     | 116.6           | 173.9           | 62.0             | 31.9             | -3.5                     | -1.4                      | -0.2                      |
| V67     | 122.1           | 173.9           | 61.5             | 33.7             | -2.4                     | -0.7                      | 0.8                       |
| S68     | 116.9           | 173.2           | 55.2             | 64.7             | -1.4                     | -3.1                      | 0.9                       |
| E69     | 123.2           | 173.1           | 54.0             | 31.8             | -3.5                     | -2.6                      | 1.9                       |
| V70     | 124.3           | 174.1           | 61.0             | 34.8             | -2.2                     | -1.2                      | 1.9                       |
| M71     | 118.6           | 174.8           | 53.9             | 42.5             | -1.5                     | -1.5                      | 9.6                       |
| G72     | 103.9           | 171.3           | 45.4             | 0.0              | -3.6                     | 0.3                       | 0.0                       |
| T74     | 114.0           | 173.5           | 61.4             | 71.3             | -1.2                     | -0.4                      | 1.5                       |
| T74     | 117.2           | 173.2           | 60.9             | 69.2             | -1.5                     | -0.9                      | -0.7                      |
| L75     | 122.1           | 174.4           | 54.5             | 46.0             | -3.2                     | -0.6                      | 3.6                       |
| A76     | 121.1           | 174.4           | 50.0             | 20.5             | -3.4                     | -2.5                      | 1.4                       |
| E77     | 118.0           | 174.6           | 53.9             | 32.2             | -2.0                     | -2.7                      | 2.3                       |
| M78     | 123.1           | 174.0           | 54.1             | 0.0              | -2.3                     | -1.3                      | 0.0                       |
| S92     | 120.0           | 173.0           | 56.5             | 65.2             | -1.6                     | -1.8                      | 1.4                       |
| I93     | 121.6           | 174.3           | 60.4             | 41.4             | -2.1                     | -0.7                      | 2.6                       |
| V94     | 125.3           | 174.1           | 60.9             | 35.1             | -2.2                     | -1.3                      | 2.2                       |
| V95     | 122.4           | 173.5           | 60.7             | 35.2             | -2.9                     | -1.5                      | 2.3                       |
| L96     | 122.1           | 173.5           | 0.0              | 0.0              | -4.1                     | 0.0                       | 0.0                       |
| S97     | 114.5           | 175.5           | 54.2             | 64.3             | 0.9                      | -4.1                      | 0.5                       |
| G98     | 117.9           | 172.8           | 49.3             | 0.0              | -2.1                     | 4.2                       | 0.0                       |
| T99     | 107.8           | 172.4           | 60.3             | 75.9             | -2.3                     | -1.5                      | 6.1                       |
| T100    | 118.2           | 172.6           | 61.3             | 67.9             | -2.1                     | -0.5                      | -2.0                      |
| A101    | 124.6           | 173.9           | 49.4             | 23.4             | -3.9                     | -3.1                      | 4.3                       |
| A102    | 120.5           | 174.4           | 50.0             | 22.0             | -3.5                     | -2.5                      | 2.9                       |
| Q103    | 120.5           | 174.7           | 53.8             | 33.8             | -1.3                     | -1.9                      | 4.4                       |
| V104    | 121.1           | 174.4           | 60.6             | 35.5             | -1.9                     | -1.6                      | 2.6                       |
| T105    | 121.7           | 173.8           | 61.3             | 70.9             | -0.9                     | -0.5                      | 1.1                       |
| T106    | 121.6           | 173.4           | 61.5             | 70.5             | -1.3                     | -0.3                      | 0.7                       |
| T107    | 121.2           | 174.0           | 60.7             | 70.5             | -0.7                     | -1.1                      | 0.7                       |



Table S5: Chemical shift assignments for backbone amide nitrogens, carbonyl carbons,  $\alpha$ -carbons, and  $\beta$ -carbons in P2 fibrils. Only assignments that were identical in all high-scoring MCASSIGN2 runs are listed.  $^{15}\text{N}$  shifts are relative to liquid  $\text{NH}_3$ .  $^{13}\text{C}$  shifts are relative to DSS. The last three columns are secondary shifts (relative to random coil values given by Wishart *et al.*, *J. Biomolec. NMR* **5**, 67-81, 1995).

| Residue | $\nu(\text{N})$ | $\nu(\text{C})$ | $\nu(\text{Ca})$ | $\nu(\text{Cb})$ | $\delta\delta(\text{C})$ | $\delta\delta(\text{Ca})$ | $\delta\delta(\text{Cb})$ |
|---------|-----------------|-----------------|------------------|------------------|--------------------------|---------------------------|---------------------------|
| S32     | 115.2           | 175.5           | 54.0             | 65.8             | 0.9                      | -4.3                      | 2.0                       |
| G33     | 114.7           | 173.7           | 48.6             | 0.0              | -1.3                     | 3.5                       | 0.0                       |
| L75     | 125.8           | 173.7           | 54.0             | 45.5             | -3.9                     | -1.1                      | 3.1                       |
| A76     | 125.8           | 175.2           | 50.1             | 21.3             | -2.6                     | -2.4                      | 2.2                       |
| E77     | 116.8           | 173.7           | 53.7             | 32.9             | -2.9                     | -2.9                      | 3.0                       |
| M78     | 119.1           | 174.7           | 54.2             | 37.9             | -1.6                     | -1.2                      | 5.0                       |
| M86     | 125.3           | 173.8           | 54.1             | 33.0             | -2.5                     | -1.3                      | 0.1                       |
| T87     | 125.7           | 175.0           | 61.4             | 69.8             | 1.8                      | 1.6                       | -0.1                      |
| P88     | 118.3           | 172.0           | 63.2             | 32.0             | -5.3                     | -0.1                      | -0.1                      |
| A89     | 123.7           | 175.2           | 49.2             | 22.9             | -2.6                     | -3.3                      | 3.8                       |
| E90     | 117.0           | 176.6           | 56.6             | 29.9             | 0.0                      | 0.0                       | 0.0                       |
| V91     | 114.1           | 173.9           | 61.2             | 33.0             | -2.5                     | -1.0                      | 0.1                       |
| S92     | 117.0           | 172.6           | 55.6             | 65.0             | -2.0                     | -2.7                      | 1.2                       |
| I93     | 125.5           | 175.5           | 61.1             | 42.3             | -0.9                     | 0.0                       | 3.5                       |
| V94     | 125.8           | 173.9           | 61.3             | 35.3             | -2.4                     | -0.9                      | 2.4                       |
| V95     | 125.4           | 174.8           | 61.5             | 33.4             | -1.5                     | -0.7                      | 0.5                       |
| L96     | 129.6           | 175.4           | 54.2             | 45.0             | -2.2                     | -0.9                      | 2.6                       |
| S97     | 118.3           | 174.7           | 55.8             | 64.4             | 0.1                      | -2.5                      | 0.6                       |
| G98     | 108.5           | 172.2           | 47.7             | 0.0              | -2.7                     | 2.6                       | 0.0                       |
| T99     | 121.6           | 174.1           | 62.3             | 70.3             | -0.6                     | 0.5                       | 0.5                       |
| T100    | 123.3           | 171.2           | 62.2             | 71.6             | -3.5                     | 0.4                       | 1.8                       |
| A101    | 125.1           | 175.1           | 49.5             | 24.2             | -2.7                     | -3.0                      | 5.1                       |
| A102    | 116.8           | 176.5           | 49.6             | 17.1             | -1.3                     | -2.9                      | -2.0                      |
| Q103    | 119.4           | 177.3           | 59.8             | 27.2             | 1.3                      | 4.1                       | -2.2                      |
| V104    | 124.6           | 175.7           | 61.4             | 33.5             | -0.6                     | -0.8                      | 0.6                       |
| T105    | 125.8           | 174.0           | 61.6             | 69.4             | -0.7                     | -0.2                      | -0.4                      |
| T106    | 125.1           | 173.6           | 61.7             | 70.2             | -1.1                     | -0.1                      | 0.4                       |
| T107    | 124.3           | 174.3           | 61.4             | 69.8             | -0.4                     | -0.4                      | 0.0                       |
| E108    | 119.1           | 174.2           | 53.4             | 33.4             | -2.4                     | -3.2                      | 3.5                       |
| W109    | 114.1           | 173.6           | 56.3             | 29.3             | -2.5                     | -1.2                      | -0.3                      |
| V110    | 112.2           | 174.7           | 60.4             | 35.9             | -1.6                     | -1.8                      | 3.0                       |
| E111    | 121.4           | 175.1           | 54.1             | 32.5             | -1.5                     | -2.6                      | 2.6                       |

Table S6: Chemical shift assignments for backbone amide nitrogens, carbonyl carbons,  $\alpha$ -carbons, and  $\beta$ -carbons in P3 fibrils. Only assignments that were identical in all high-scoring MCASSIGN2 runs are listed.  $^{15}\text{N}$  shifts are relative to liquid  $\text{NH}_3$ .  $^{13}\text{C}$  shifts are relative to DSS. The last three columns are secondary shifts (relative to random coil values given by Wishart *et al.*, J. Biomolec. NMR **5**, 67-81, 1995).

| Residue | $\nu(\text{N})$ | $\nu(\text{C})$ | $\nu(\text{Ca})$ | $\nu(\text{Cb})$ | $\delta\delta(\text{C})$ | $\delta\delta(\text{Ca})$ | $\delta\delta(\text{Cb})$ |
|---------|-----------------|-----------------|------------------|------------------|--------------------------|---------------------------|---------------------------|
| T28     | 120.4           | 172.6           | 60.8             | 71.9             | -2.1                     | -1.0                      | 2.1                       |
| A29     | 122.6           | 175.0           | 49.5             | 23.0             | -2.8                     | -3.0                      | 3.9                       |
| E30     | 118.7           | 170.9           | 53.0             | 29.6             | -4.0                     | -1.2                      | 0.4                       |
| P31     | 129.4           | 174.8           | 62.3             | 32.5             | -2.5                     | -1.0                      | 0.4                       |
| S32     | 112.6           | 174.3           | 56.5             | 65.2             | -0.3                     | -1.8                      | 1.4                       |
| G33     | 110.6           | 173.3           | 45.4             | 0.0              | -1.6                     | 0.3                       | 0.0                       |
| T34     | 116.9           | 173.2           | 61.4             | 70.7             | -1.5                     | -0.4                      | 0.9                       |
| T35     | 118.6           | 174.0           | 61.0             | 71.4             | -0.8                     | -0.9                      | 1.6                       |
| S36     | 119.3           | 174.2           | 56.8             | 63.2             | -0.4                     | -1.5                      | -0.7                      |
| V37     | 119.3           | 170.4           | 58.5             | 33.4             | -5.9                     | -3.7                      | 0.5                       |
| Q38     | 117.7           | 174.5           | 54.4             | 31.4             | -1.5                     | -1.3                      | 2.0                       |
| V39     | 123.0           | 173.7           | 61.3             | 35.0             | -1.3                     | 1.5                       | 2.4                       |
| A55     | 120.5           | 174.9           | 50.7             | 22.8             | -2.9                     | -1.8                      | 3.7                       |
| E56     | 117.6           | 176.3           | 54.5             | 31.5             | -0.3                     | -2.1                      | 1.6                       |
| A83     | 120.5           | 175.3           | 50.7             | 22.8             | -2.5                     | -1.8                      | 3.7                       |
| T84     | 117.2           | 173.4           | 61.6             | 70.7             | -1.3                     | -0.2                      | 0.9                       |
| G85     | 108.6           | 172.2           | 43.9             | 0.0              | -2.7                     | -1.2                      | 0.0                       |
| M86     | 114.4           | 174.3           | 53.8             | 39.4             | -2.0                     | -1.6                      | 6.5                       |
| T87     | 115.4           | 169.8           | 58.7             | 68.8             | -3.4                     | -1.1                      | -1.0                      |
| P88     | 131.7           | 173.8           | 60.8             | 32.8             | -3.6                     | -2.5                      | 0.7                       |
| A89     | 120.6           | 175.1           | 50.3             | 21.1             | -2.7                     | -2.2                      | 2.0                       |
| E90     | 121.1           | 174.0           | 54.0             | 28.6             | -2.6                     | -2.6                      | -1.3                      |
| V91     | 117.6           | 176.1           | 60.4             | 35.7             | -0.2                     | -1.8                      | 2.8                       |
| S92     | 123.8           | 173.8           | 56.3             | 63.2             | -0.8                     | -2.0                      | -0.6                      |
| I93     | 124.7           | 173.8           | 59.9             | 41.6             | -2.6                     | -1.2                      | 2.8                       |
| V94     | 125.4           | 174.1           | 61.0             | 35.3             | -2.2                     | -1.2                      | 2.4                       |
| V95     | 125.9           | 174.1           | 61.1             | 35.2             | -2.2                     | -1.1                      | 2.3                       |
| L96     | 122.5           | 176.0           | 53.9             | 44.1             | -1.6                     | -1.2                      | 1.7                       |
| S97     | 112.8           | 177.1           | 55.4             | 64.8             | 2.5                      | -2.9                      | 1.0                       |
| G98     | 116.1           | 174.7           | 48.5             | 0.0              | -0.2                     | 3.4                       | 0.0                       |
| T99     | 112.4           | 172.2           | 62.3             | 73.1             | -2.5                     | 0.5                       | 3.3                       |
| T100    | 119.7           | 173.7           | 60.7             | 70.8             | -1.0                     | -1.1                      | 1.0                       |
| A101    | 121.9           | 172.4           | 52.2             | 16.0             | -5.4                     | -0.3                      | -3.1                      |
| A102    | 116.5           | 175.5           | 49.4             | 23.0             | -2.4                     | -3.1                      | 3.9                       |
| Q103    | 118.6           | 174.4           | 54.2             | 34.8             | -1.6                     | -1.6                      | 5.4                       |
| V104    | 122.0           | 175.2           | 60.6             | 35.2             | -1.2                     | -1.6                      | 2.3                       |
| T105    | 123.2           | 173.3           | 61.6             | 70.7             | -1.4                     | -0.2                      | 0.9                       |
| T106    | 122.9           | 173.5           | 61.6             | 70.7             | -1.2                     | -0.2                      | 0.9                       |
| T107    | 123.1           | 172.7           | 61.6             | 70.7             | -2.0                     | -0.2                      | 0.9                       |
| E108    | 123.1           | 173.9           | 53.5             | 32.2             | -2.8                     | -3.1                      | 2.3                       |
| W109    | 113.0           | 176.9           | 56.7             | 30.2             | 0.8                      | -0.9                      | 0.6                       |
